# Supplementary material for: Development of bioactive and ultrasound-responsive microdroplets for preventing ovariectomy (OVX)-induced osteoporosis
Source: Royal Society of Chemistry journal article supplement (doi:10.1039/d3tb01726e), 2023-01-01
Supplement: d3tb01726e1.pdf [file d3tb01726e1.pdf]

## Supplementary Information

### **Development of bioactive and ultrasound-responsive microdroplets for preventing ovariectomy (OVX)-induced osteoporosis**

Yi Zhang<sup>1#</sup>, Yi Dang<sup>2</sup>, Yaping Ma<sup>2</sup>, Dingmei Zhang<sup>2,5</sup>, Xin Wang<sup>1,2,3,4\*</sup>

## Supplementary Figure 1

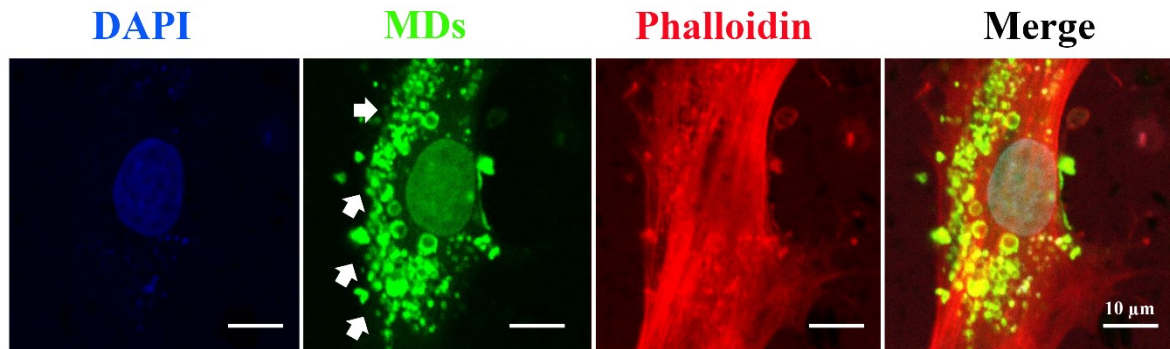

**Supplementary Figure 1.** Internalization of MDs into hBMSCs. Representative confocal laser scanning microscopy image demonstrate the uptake of FITC-MDs by hBMSCs. Cell cytoskeletons were shown in red color, while the blue channel indicates the nuclear staining. The FITC-MDs-NFATc1 is denoted by the white arrow. Scale bar = 10 μm.

## Supplementary Figure2

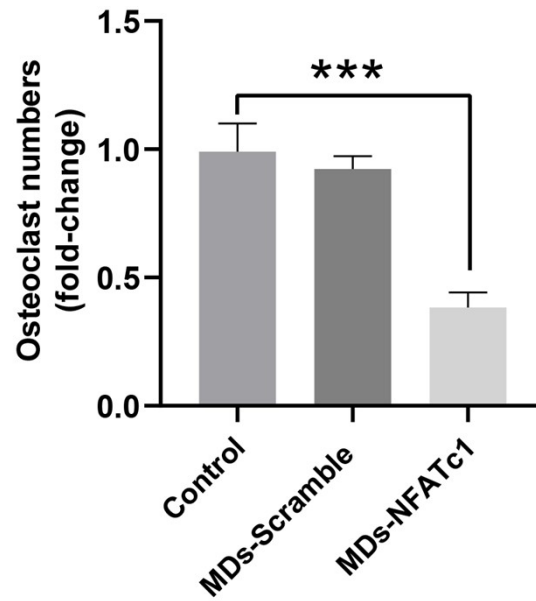

**Supplementary Figure 2.** Quantification of TRAP-positive osteoclasts. Significant differences between the treated and non-treated control groups are indicated with \*\*\*( $p < 0.001$ ).

**Supplementary Figure3**

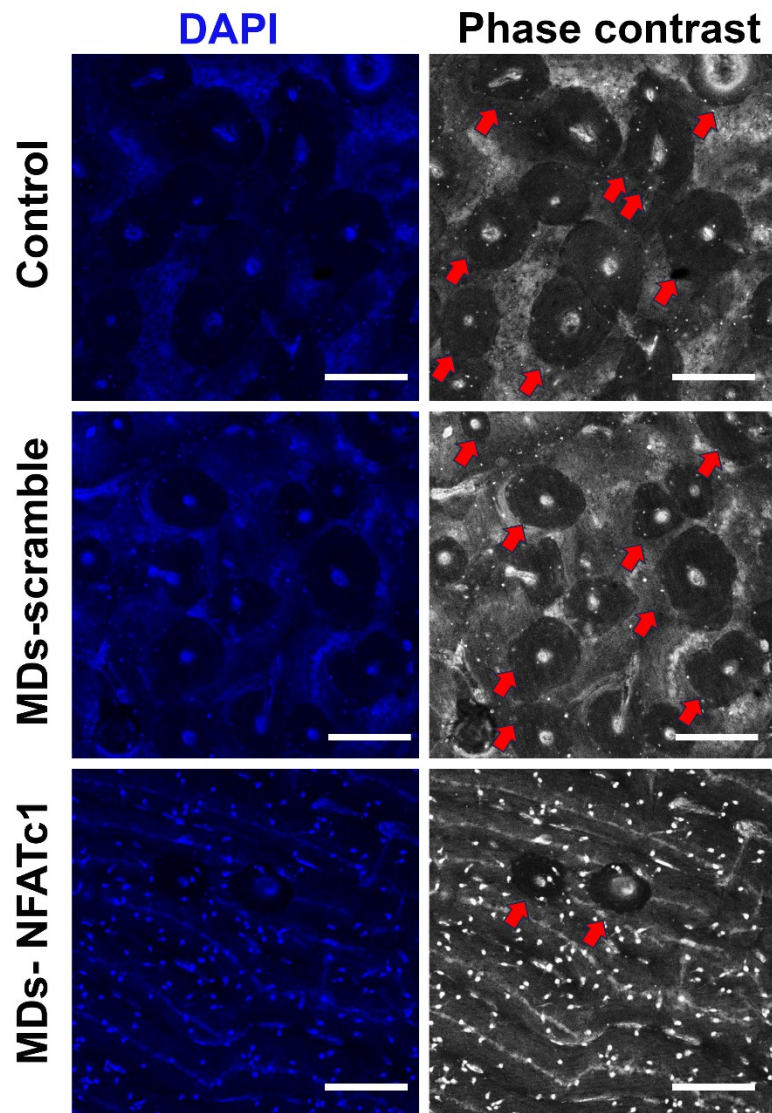

**Supplementary Figure 3.** *In vitro* osteoclastic bone resorption. The osteoclast precursor cells were cultured on bone discs with varying MDs formulations for 7 days. Following fixation, the samples were subjected to DAPI staining and examination using confocal microscopy. The red arrows indicate the bone resorption pit. The scale bar represents 50  $\mu\text{m}$ .
